# Supplementary material for: Character Strengths in the Life Domains of Work, Education, Leisure, and Relationships and Their Associations With Flourishing
Source: PubMed Central journal article supplement (PMC8096931; doi:10.3389/fpsyg.2021.597534), 2021-04-21
Supplement: Data_Sheet_1.pdf [file Data_Sheet_1.pdf]

## **Supplementary Materials for "Character Strengths in the Life Domains of Work, Education, Leisure, and Relationships, and their Associations with Flourishing"**

### **(1) Life Domain Descriptions**

#### **German:**

##### *Beruf:*

Bei diesem Lebensbereich handelt es sich um jede Art von Arbeitsstelle. Es kann sich um einen Nebenjob, eine Teilzeit- oder Vollzeitstelle handeln, um ein Angestelltenverhältnis oder eine selbstständige Tätigkeit. Wenn Sie verschiedenen beruflichen Tätigkeiten nachgehen, dann denken Sie bitte bei Beantwortung der folgenden Fragen an die Tätigkeiten, die Ihnen am wichtigsten ist.

##### *Ausbildung:*

Bei diesem Lebensbereich handelt es sich um jede mögliche Art von Ausbildung: Schule, Studium, Weiterbildungsmaßnahmen außerhalb der Arbeitszeit und auch autodidaktisches Lernen z.B. von Sprachen. Sollten Sie mehrere Arten von Ausbildung ausüben, dann denken Sie bei der Beantwortung der folgenden Fragen bitte an die Ausbildung, die Ihnen am wichtigsten ist.

##### *Enges soziales Umfeld:*

Dies schließt Ihre Familie und Freunde ein. Bitte denken Sie bei der Beantwortung der folgenden Fragen an die Menschen, mit denen Sie Ihre Gedanken und Gefühle teilen und mit denen Sie sich eng verbunden fühlen.

##### *Partnerschaft:*

Partnerschaft mit einem Lebenspartner oder einer Lebenspartnerin, Freund / Freundin, Ehemann / Ehefrau etc.

##### *Freizeitbeschäftigung:*

Bei diesem Lebensbereich handelt es sich um jede Art von Freizeitbeschäftigung, wie zum Beispiel sportliche (z.B. Klettern), religiöse (z.B. Gottesdienst), ehrenamtliche (z.B. Ferienfahrten mit Kindern) oder kreative (z.B. Kochen) Beschäftigungen. Wenn Sie verschiedenen Freizeitbeschäftigungen nachgehen, dann denken Sie bitte an die Freizeitbeschäftigung, die Ihnen am wichtigsten ist.

#### **English (tentative translations):**

##### *Work:*

This area of life refers to any type of work. It can be a part-time job, a part-time or full-time job, an employee or self-employed. If you have more than one job, please think of the occupation that is most important to you when answering the following questions.

##### *Education:*

This area of your life refers to any type of training: school, university, further education outside working hours, and also self-taught learning of languages, for example. If you pursue more than one type of education, please think of the education that is most important to you when answering the following questions.

*Close personal relationships:*

This includes your family and friends. When answering the following questions, please think about the people with whom you share your thoughts and feelings and with whom you feel a close connection.

*Romantic relationships:*

Partnership with a life partner, boyfriend/girlfriend, husband/wife, etc.

*Leisure:*

This life domain is about any type of leisure activity, such as athletic (e.g., rock climbing), religious (e.g., worship), volunteer (e.g., vacation trips with children), or creative (e.g., cooking) pursuits. If you pursue more than one leisure activity, please think of the leisure activity that is most important to you.

## (2) Supplementary tables

**Table S1**

*Means, standard deviations, internal consistency coefficients, correlations with age and sex of all VIA-IS scales*

|                     | <i>M</i> | <i>SD</i> | $\alpha$ | <i>r</i> <sub>age</sub> | <i>r</i> <sub>sex</sub> |
|---------------------|----------|-----------|----------|-------------------------|-------------------------|
| Creativity          | 3.40     | 0.68      | .89      | .16*                    | -.20*                   |
| Curiosity           | 3.82     | 0.50      | .78      | .37*                    | -.15*                   |
| Judgment            | 3.88     | 0.49      | .79      | .05                     | -.08                    |
| Love of Learning    | 3.61     | 0.60      | .81      | .17*                    | -.04                    |
| Perspective         | 3.65     | 0.50      | .80      | -.08                    | -.09                    |
| Bravery             | 3.52     | 0.55      | .78      | .25*                    | -.13                    |
| Perseverance        | 3.50     | 0.61      | .86      | .14*                    | -.07                    |
| Honesty             | 3.84     | 0.45      | .75      | .24*                    | .00                     |
| Zest                | 3.43     | 0.59      | .81      | .17*                    | -.14                    |
| Love                | 3.93     | 0.56      | .78      | .17*                    | -.06                    |
| Kindness            | 3.82     | 0.47      | .73      | .20*                    | -.03                    |
| Social Intelligence | 3.81     | 0.46      | .78      | .02                     | -.07                    |
| Teamwork            | 3.66     | 0.49      | .75      | .15*                    | -.17*                   |
| Fairness            | 3.88     | 0.48      | .76      | .23*                    | .03                     |
| Leadership          | 3.63     | 0.47      | .74      | .18*                    | -.09                    |
| Forgiveness         | 3.40     | 0.56      | .80      | .29*                    | -.04                    |
| Humility            | 3.21     | 0.59      | .81      | .15*                    | .10                     |
| Prudence            | 3.44     | 0.59      | .80      | .11                     | -.01                    |
| Self-Regulation     | 3.20     | 0.59      | .74      | .18*                    | -.18*                   |
| Beauty              | 3.41     | 0.61      | .78      | .12                     | .07                     |
| Gratitude           | 3.71     | 0.55      | .82      | .17*                    | .15*                    |
| Hope                | 3.55     | 0.59      | .79      | .22*                    | -.08                    |
| Humor               | 3.59     | 0.61      | .87      | .02                     | -.15*                   |
| Spirituality        | 2.54     | 0.92      | .91      | .22*                    | .15*                    |

*Notes.* *N* = 203. Beauty = appreciation of beauty and excellence. Age = Age in years. Sex: 1 = male, 2 = female.

\**p* < .05 (two-tailed).

**Table S2***Means, Standard Deviations and Internal Consistency Coefficients for Character Strengths' Relevance (ACS-RS) Across all Life Domains*

|                     | Work<br><i>N</i> = 154 |           |          | Education<br><i>N</i> = 179 |           |          | Leisure<br><i>N</i> = 190 |           |          | Close Personal<br>Relationships<br><i>N</i> = 197 |           |          | Romantic Relationships<br><i>N</i> = 140 |           |          |
|---------------------|------------------------|-----------|----------|-----------------------------|-----------|----------|---------------------------|-----------|----------|---------------------------------------------------|-----------|----------|------------------------------------------|-----------|----------|
|                     | <i>M</i>               | <i>SD</i> | $\alpha$ | <i>M</i>                    | <i>SD</i> | $\alpha$ | <i>M</i>                  | <i>SD</i> | $\alpha$ | <i>M</i>                                          | <i>SD</i> | $\alpha$ | <i>M</i>                                 | <i>SD</i> | $\alpha$ |
| Creativity          | 3.52                   | 0.96      | .84      | 3.37                        | 0.92      | .81      | 3.92                      | 0.87      | .88      | 3.35                                              | 0.86      | .82      | 3.57                                     | 0.89      | .83      |
| Curiosity           | 3.81                   | 0.78      | .74      | 4.23                        | 0.64      | .73      | 4.01                      | 0.76      | .84      | 3.65                                              | 0.76      | .75      | 3.76                                     | 0.77      | .80      |
| Judgment            | 3.95                   | 0.74      | .72      | 4.01                        | 0.74      | .74      | 3.44                      | 0.93      | .84      | 3.76                                              | 0.70      | .71      | 3.91                                     | 0.69      | .76      |
| Love of Learning    | 3.74                   | 0.87      | .79      | 4.31                        | 0.70      | .75      | 3.85                      | 0.92      | .86      | 3.04                                              | 0.91      | .81      | 3.37                                     | 0.93      | .87      |
| Perspective         | 3.78                   | 0.85      | .79      | 3.86                        | 0.81      | .76      | 3.45                      | 0.94      | .85      | 3.86                                              | 0.71      | .75      | 3.88                                     | 0.72      | .82      |
| Bravery             | 2.90                   | 1.06      | .89      | 2.76                        | 0.96      | .78      | 3.18                      | 1.03      | .90      | 3.39                                              | 0.82      | .81      | 3.65                                     | 0.88      | .84      |
| Perseverance        | 3.90                   | 0.77      | .75      | 4.22                        | 0.65      | .60      | 3.98                      | 0.86      | .87      | 3.59                                              | 0.81      | .81      | 4.06                                     | 0.77      | .83      |
| Honesty             | 4.06                   | 0.75      | .71      | 3.57                        | 0.93      | .76      | 3.66                      | 1.03      | .88      | 4.34                                              | 0.61      | .79      | 4.44                                     | 0.57      | .74      |
| Zest                | 3.73                   | 0.82      | .71      | 3.52                        | 0.81      | .70      | 4.15                      | 0.70      | .84      | 4.13                                              | 0.67      | .80      | 4.13                                     | 0.69      | .77      |
| Love                | 3.22                   | 1.02      | .84      | 2.96                        | 1.00      | .78      | 3.07                      | 1.05      | .90      | 4.40                                              | 0.64      | .84      | 4.56                                     | 0.53      | .74      |
| Kindness            | 4.23                   | 0.71      | .72      | 3.62                        | 0.87      | .77      | 3.55                      | 1.04      | .89      | 4.50                                              | 0.51      | .77      | 4.51                                     | 0.49      | .72      |
| Social Intelligence | 4.15                   | 0.76      | .75      | 3.86                        | 0.88      | .78      | 3.49                      | 1.09      | .89      | 4.53                                              | 0.49      | .79      | 4.54                                     | 0.51      | .79      |
| Teamwork            | 4.02                   | 0.85      | .78      | 3.58                        | 0.90      | .80      | 3.41                      | 1.16      | .92      | 4.06                                              | 0.74      | .80      | 4.01                                     | 0.86      | .84      |
| Fairness            | 3.96                   | 0.85      | .77      | 3.49                        | 0.90      | .76      | 3.51                      | 1.12      | .91      | 4.18                                              | 0.66      | .81      | 4.12                                     | 0.74      | .80      |
| Leadership          | 3.49                   | 1.01      | .81      | 2.95                        | 0.95      | .80      | 2.87                      | 1.14      | .90      | 3.04                                              | 0.98      | .86      | 3.04                                     | 1.14      | .91      |
| Forgiveness         | 3.23                   | 0.97      | .82      | 2.75                        | 0.95      | .79      | 2.93                      | 1.10      | .89      | 3.96                                              | 0.72      | .76      | 4.19                                     | 0.69      | .80      |
| Humility            | 3.22                   | 0.84      | .72      | 2.98                        | 0.93      | .75      | 3.13                      | 0.98      | .85      | 3.63                                              | 0.70      | .72      | 3.66                                     | 0.80      | .80      |
| Prudence            | 3.48                   | 0.89      | .82      | 3.37                        | 0.87      | .82      | 3.19                      | 0.96      | .87      | 3.09                                              | 0.89      | .85      | 3.40                                     | 0.95      | .86      |
| Self-Regulation     | 3.93                   | 0.75      | .71      | 3.83                        | 0.78      | .72      | 3.39                      | 1.00      | .89      | 3.48                                              | 0.80      | .82      | 3.63                                     | 0.89      | .84      |
| Beauty              | 3.08                   | 1.16      | .85      | 2.77                        | 1.03      | .82      | 3.80                      | 1.03      | .91      | 3.65                                              | 0.88      | .83      | 3.95                                     | 0.95      | .89      |
| Gratitude           | 3.26                   | 1.06      | .83      | 2.85                        | 0.99      | .80      | 3.49                      | 1.09      | .91      | 3.98                                              | 0.73      | .82      | 4.25                                     | 0.65      | .78      |
| Hope                | 3.39                   | 0.95      | .79      | 3.42                        | 0.92      | .78      | 3.52                      | 0.97      | .84      | 3.80                                              | 0.76      | .82      | 4.15                                     | 0.66      | .82      |
| Humor               | 3.74                   | 0.93      | .82      | 3.24                        | 0.95      | .82      | 3.62                      | 1.04      | .88      | 4.25                                              | 0.65      | .79      | 4.25                                     | 0.67      | .83      |
| Spirituality        | 1.92                   | 1.13      | .88      | 1.83                        | 1.05      | .87      | 2.16                      | 1.28      | .95      | 2.18                                              | 1.22      | .93      | 2.21                                     | 1.30      | .93      |

*Notes.* Beauty = appreciation of beauty and excellence.

**Table S3***Means and Standard Deviations for Strengths-Related Behavior (ACS-RS) Across all Life Domains*

|                     | Work<br><i>N</i> = 154 |           | Education<br><i>N</i> = 179 |           | Leisure<br><i>N</i> = 190 |           | Close Personal<br>Relationships<br><i>N</i> = 197 |           | Romantic<br>Relationships<br><i>N</i> = 140 |           |
|---------------------|------------------------|-----------|-----------------------------|-----------|---------------------------|-----------|---------------------------------------------------|-----------|---------------------------------------------|-----------|
|                     | <i>M</i>               | <i>SD</i> | <i>M</i>                    | <i>SD</i> | <i>M</i>                  | <i>SD</i> | <i>M</i>                                          | <i>SD</i> | <i>M</i>                                    | <i>SD</i> |
| Creativity          | 3.47                   | 1.04      | 3.23                        | 1.05      | 3.76                      | 0.92      | 3.31                                              | 0.99      | 3.52                                        | 0.94      |
| Curiosity           | 3.95                   | 0.85      | 4.12                        | 0.77      | 4.02                      | 0.81      | 3.73                                              | 0.93      | 3.78                                        | 0.82      |
| Judgment            | 3.99                   | 0.71      | 3.84                        | 0.84      | 3.49                      | 1.03      | 3.78                                              | 0.82      | 3.85                                        | 0.81      |
| Love of Learning    | 3.73                   | 1.03      | 4.01                        | 0.87      | 3.80                      | 0.97      | 3.19                                              | 1.04      | 3.36                                        | 1.04      |
| Perspective         | 3.79                   | 0.91      | 3.75                        | 0.85      | 3.46                      | 0.96      | 3.85                                              | 0.79      | 3.84                                        | 0.84      |
| Bravery             | 3.15                   | 1.15      | 2.79                        | 1.05      | 3.14                      | 1.10      | 3.36                                              | 1.00      | 3.56                                        | 0.98      |
| Perseverance        | 3.97                   | 0.88      | 3.97                        | 0.82      | 3.92                      | 0.95      | 3.62                                              | 0.93      | 4.03                                        | 0.87      |
| Honesty             | 4.18                   | 0.79      | 3.81                        | 0.92      | 3.91                      | 0.99      | 4.25                                              | 0.77      | 4.41                                        | 0.73      |
| Zest                | 3.72                   | 0.90      | 3.54                        | 0.94      | 4.01                      | 0.80      | 3.93                                              | 0.81      | 3.89                                        | 0.77      |
| Love                | 3.44                   | 1.09      | 3.14                        | 1.04      | 3.27                      | 1.11      | 4.11                                              | 0.87      | 4.34                                        | 0.71      |
| Kindness            | 4.38                   | 0.74      | 4.03                        | 0.84      | 3.85                      | 1.03      | 4.47                                              | 0.62      | 4.42                                        | 0.62      |
| Social Intelligence | 4.28                   | 0.75      | 3.97                        | 0.85      | 3.75                      | 1.08      | 4.39                                              | 0.69      | 4.38                                        | 0.66      |
| Teamwork            | 4.09                   | 0.81      | 3.64                        | 0.91      | 3.56                      | 1.13      | 3.92                                              | 0.87      | 3.89                                        | 0.96      |
| Fairness            | 4.13                   | 0.76      | 3.80                        | 0.90      | 3.63                      | 1.08      | 4.10                                              | 0.70      | 4.16                                        | 0.71      |
| Leadership          | 3.55                   | 1.06      | 3.05                        | 1.08      | 2.92                      | 1.17      | 3.07                                              | 1.06      | 3.11                                        | 1.18      |
| Forgiveness         | 3.38                   | 0.94      | 3.20                        | 1.02      | 3.19                      | 1.13      | 3.78                                              | 0.88      | 3.93                                        | 0.86      |
| Humility            | 3.68                   | 0.90      | 3.60                        | 0.97      | 3.40                      | 1.07      | 3.77                                              | 0.83      | 3.70                                        | 0.91      |
| Prudence            | 3.69                   | 0.95      | 3.62                        | 0.91      | 3.23                      | 1.05      | 3.21                                              | 0.98      | 3.39                                        | 1.01      |
| Self-Regulation     | 4.02                   | 0.79      | 3.81                        | 0.81      | 3.46                      | 1.03      | 3.53                                              | 0.88      | 3.47                                        | 0.96      |
| Beauty              | 3.31                   | 1.16      | 3.01                        | 1.13      | 3.78                      | 1.07      | 3.68                                              | 0.97      | 3.80                                        | 1.01      |
| Gratitude           | 3.49                   | 1.06      | 3.27                        | 1.06      | 3.62                      | 1.12      | 3.91                                              | 0.81      | 4.10                                        | 0.83      |
| Hope                | 3.58                   | 0.99      | 3.50                        | 0.97      | 3.63                      | 1.03      | 3.72                                              | 0.87      | 4.03                                        | 0.80      |
| Humor               | 3.83                   | 1.00      | 3.59                        | 1.10      | 3.84                      | 1.03      | 4.07                                              | 0.85      | 4.09                                        | 0.88      |
| Spirituality        | 2.09                   | 1.34      | 1.88                        | 1.19      | 2.14                      | 1.36      | 2.12                                              | 1.28      | 2.19                                        | 1.36      |

*Notes.* Beauty = appreciation of beauty and excellence.

**Table S4***Effect sizes (Cohen's d) for Comparisons of Respective Life Domain with the Mean Across all Life Domains*

|                     | Character Strengths' Relevance |                             |                           |                                                   |                                             | Strengths-Related Behavior |                             |                           |                                                   |                                             |
|---------------------|--------------------------------|-----------------------------|---------------------------|---------------------------------------------------|---------------------------------------------|----------------------------|-----------------------------|---------------------------|---------------------------------------------------|---------------------------------------------|
|                     | Work<br><i>N</i> = 154         | Education<br><i>N</i> = 179 | Leisure<br><i>N</i> = 190 | Close Personal<br>Relationships<br><i>N</i> = 197 | Romantic<br>Relationships<br><i>N</i> = 140 | Work<br><i>N</i> = 154     | Education<br><i>N</i> = 179 | Leisure<br><i>N</i> = 190 | Close Personal<br>Relationships<br><i>N</i> = 197 | Romantic<br>Relationships<br><i>N</i> = 140 |
| Creativity          | -0.01                          | -0.17                       | 0.45                      | -0.21                                             | 0.04                                        | 0.05                       | -0.18                       | 0.37                      | -0.11                                             | 0.11                                        |
| Curiosity           | -0.12                          | 0.52                        | 0.14                      | -0.33                                             | -0.18                                       | 0.04                       | 0.26                        | 0.12                      | -0.20                                             | -0.17                                       |
| Judgment            | 0.23                           | 0.31                        | -0.37                     | -0.03                                             | 0.19                                        | 0.32                       | 0.10                        | -0.26                     | 0.02                                              | 0.11                                        |
| Love of Learning    | 0.10                           | 0.94                        | 0.22                      | -0.67                                             | -0.30                                       | 0.12                       | 0.46                        | 0.20                      | -0.40                                             | -0.24                                       |
| Perspective         | 0.05                           | 0.15                        | -0.31                     | 0.17                                              | 0.19                                        | 0.09                       | 0.05                        | -0.26                     | 0.18                                              | 0.15                                        |
| Bravery             | -0.23                          | -0.40                       | 0.04                      | 0.30                                              | 0.58                                        | -0.01                      | -0.35                       | -0.02                     | 0.20                                              | 0.41                                        |
| Perseverance        | -0.04                          | 0.45                        | 0.06                      | -0.42                                             | 0.17                                        | 0.11                       | 0.12                        | 0.05                      | -0.27                                             | 0.18                                        |
| Honesty             | 0.11                           | -0.44                       | -0.31                     | 0.59                                              | 0.81                                        | 0.13                       | -0.29                       | -0.17                     | 0.22                                              | 0.45                                        |
| Zest                | -0.22                          | -0.48                       | 0.34                      | 0.33                                              | 0.32                                        | -0.08                      | -0.27                       | 0.28                      | 0.17                                              | 0.13                                        |
| Love                | -0.37                          | -0.64                       | -0.50                     | 1.25                                              | 1.81                                        | -0.16                      | -0.45                       | -0.31                     | 0.57                                              | 1.03                                        |
| Kindness            | 0.25                           | -0.49                       | -0.48                     | 0.88                                              | 0.94                                        | 0.23                       | -0.21                       | -0.35                     | 0.42                                              | 0.34                                        |
| Social Intelligence | 0.08                           | -0.26                       | -0.55                     | 0.90                                              | 0.88                                        | 0.20                       | -0.19                       | -0.35                     | 0.38                                              | 0.38                                        |
| Teamwork            | 0.28                           | -0.22                       | -0.32                     | 0.38                                              | 0.27                                        | 0.37                       | -0.16                       | -0.20                     | 0.15                                              | 0.10                                        |
| Fairness            | 0.15                           | -0.38                       | -0.29                     | 0.53                                              | 0.39                                        | 0.26                       | -0.14                       | -0.28                     | 0.24                                              | 0.32                                        |
| Leadership          | 0.46                           | -0.08                       | -0.14                     | 0.01                                              | 0.01                                        | 0.43                       | -0.04                       | -0.15                     | -0.02                                             | 0.02                                        |
| Forgiveness         | -0.15                          | -0.66                       | -0.41                     | 0.81                                              | 1.17                                        | -0.10                      | -0.26                       | -0.25                     | 0.35                                              | 0.53                                        |
| Humility            | -0.12                          | -0.37                       | -0.19                     | 0.44                                              | 0.43                                        | 0.04                       | -0.04                       | -0.22                     | 0.16                                              | 0.07                                        |
| Prudence            | 0.22                           | 0.10                        | -0.09                     | -0.21                                             | 0.13                                        | 0.29                       | 0.23                        | -0.17                     | -0.20                                             | -0.02                                       |
| Self-Regulation     | 0.40                           | 0.26                        | -0.24                     | -0.19                                             | 0.00                                        | 0.48                       | 0.21                        | -0.17                     | -0.13                                             | -0.18                                       |
| Beauty              | -0.31                          | -0.65                       | 0.35                      | 0.24                                              | 0.54                                        | -0.16                      | -0.42                       | 0.27                      | 0.20                                              | 0.31                                        |
| Gratitude           | -0.26                          | -0.70                       | -0.05                     | 0.60                                              | 1.09                                        | -0.15                      | -0.36                       | -0.03                     | 0.32                                              | 0.54                                        |
| Hope                | -0.24                          | -0.22                       | -0.10                     | 0.24                                              | 0.80                                        | -0.08                      | -0.16                       | -0.03                     | 0.07                                              | 0.46                                        |
| Humor               | -0.04                          | -0.57                       | -0.15                     | 0.72                                              | 0.70                                        | -0.02                      | -0.24                       | -0.01                     | 0.26                                              | 0.27                                        |
| Spirituality        | -0.12                          | -0.22                       | 0.08                      | 0.10                                              | 0.12                                        | 0.01                       | -0.17                       | 0.04                      | 0.03                                              | 0.08                                        |

*Notes.* Beauty = appreciation of beauty and excellence.

**Table S5*****Correlations of VIA-IS Scales with Character Strengths' Relevance Across Different Life Domains***

|                     | Work<br><i>N</i> = 154 | Education<br><i>N</i> = 179 | Leisure<br><i>N</i> = 190 | Close Personal<br>Relationships<br><i>N</i> = 197 | Romantic<br>Relationships<br><i>N</i> = 140 | Mean<br>Relevance<br><i>N</i> = 203 |
|---------------------|------------------------|-----------------------------|---------------------------|---------------------------------------------------|---------------------------------------------|-------------------------------------|
| Creativity          | .45*                   | .53*                        | .50*                      | .50*                                              | .51*                                        | .63*                                |
| Curiosity           | .42*                   | .18                         | .36*                      | .36*                                              | .26*                                        | .44*                                |
| Judgment            | .27*                   | .32*                        | .27*                      | .16                                               | .16                                         | .35*                                |
| Love of Learning    | .32*                   | .28*                        | .36*                      | .25*                                              | .10                                         | .42*                                |
| Perspective         | .35*                   | .24*                        | .30*                      | .40*                                              | .36*                                        | .45*                                |
| Bravery             | .23*                   | .17                         | .26*                      | .26*                                              | .33*                                        | .33*                                |
| Perseverance        | .34*                   | .21*                        | .26*                      | .26*                                              | .17                                         | .40*                                |
| Honesty             | .25*                   | .32*                        | .15                       | .21*                                              | .20                                         | .31*                                |
| Zest                | .32*                   | .45*                        | .32*                      | .25*                                              | .24*                                        | .46*                                |
| Love                | .26*                   | .28*                        | .40*                      | .26*                                              | .09                                         | .48*                                |
| Kindness            | .27*                   | .29*                        | .24*                      | .21*                                              | .25*                                        | .39*                                |
| Social Intelligence | .27*                   | .28*                        | .23*                      | .22*                                              | .20                                         | .36*                                |
| Teamwork            | .43*                   | .30*                        | .32*                      | .42*                                              | .34*                                        | .52*                                |
| Fairness            | .38*                   | .38*                        | .29*                      | .41*                                              | .30*                                        | .50*                                |
| Leadership          | .48*                   | .40*                        | .32*                      | .45*                                              | .38*                                        | .53*                                |
| Forgiveness         | .41*                   | .25*                        | .20*                      | .28*                                              | .12                                         | .38*                                |
| Humility            | .39*                   | .43*                        | .34*                      | .53*                                              | .36*                                        | .51*                                |
| Prudence            | .29*                   | .26*                        | .28*                      | .28*                                              | .21                                         | .35*                                |
| Self-Regulation     | .18                    | -.01                        | .20*                      | .21*                                              | .22                                         | .23*                                |
| Beauty              | .43*                   | .48*                        | .41*                      | .46*                                              | .53*                                        | .58*                                |
| Gratitude           | .51*                   | .44*                        | .45*                      | .44*                                              | .41*                                        | .59*                                |
| Hope                | .29*                   | .21*                        | .31*                      | .21*                                              | .10                                         | .33*                                |
| Humor               | .54*                   | .50*                        | .41*                      | .52*                                              | .41*                                        | .61*                                |
| Spirituality        | .65*                   | .65*                        | .71*                      | .75*                                              | .79*                                        | .77*                                |

*Notes.* Beauty = appreciation of beauty and excellence.

\* $p < .01$  (two-tailed).

**Table S7*****Correlations of VIA-IS Scales with Strengths-Related Behavior Across Different Life Domains***

|                     | Work<br><i>N</i> = 154 | Education<br><i>N</i> = 179 | Leisure<br><i>N</i> = 190 | Close Personal<br>Relationships<br><i>N</i> = 197 | Romantic<br>Relationships<br><i>N</i> = 140 | Mean<br>Behavior<br><i>N</i> = 203 |
|---------------------|------------------------|-----------------------------|---------------------------|---------------------------------------------------|---------------------------------------------|------------------------------------|
| Creativity          | .51*                   | .57*                        | .48*                      | .57*                                              | .50*                                        | .67*                               |
| Curiosity           | .40*                   | .27*                        | .36*                      | .34*                                              | .28*                                        | .45*                               |
| Judgment            | .36*                   | .33*                        | .29*                      | .34*                                              | .40*                                        | .49*                               |
| Love of Learning    | .34*                   | .39*                        | .40*                      | .30*                                              | .28*                                        | .49*                               |
| Perspective         | .22*                   | .31*                        | .37*                      | .23*                                              | .37*                                        | .44*                               |
| Bravery             | .35*                   | .26*                        | .25*                      | .39*                                              | .41*                                        | .42*                               |
| Perseverance        | .38*                   | .50*                        | .37*                      | .35*                                              | .21*                                        | .54*                               |
| Honesty             | .23*                   | .37*                        | .18                       | .28*                                              | .24*                                        | .35*                               |
| Zest                | .49*                   | .59*                        | .33*                      | .49*                                              | .25*                                        | .60*                               |
| Love                | .18                    | .41*                        | .36*                      | .46*                                              | .26*                                        | .55*                               |
| Kindness            | .37*                   | .27*                        | .27*                      | .37*                                              | .31*                                        | .41*                               |
| Social Intelligence | .33*                   | .38*                        | .24*                      | .42*                                              | .30*                                        | .46*                               |
| Teamwork            | .40*                   | .39*                        | .32*                      | .46*                                              | .43*                                        | .57*                               |
| Fairness            | .50*                   | .36*                        | .27*                      | .48*                                              | .35*                                        | .53*                               |
| Leadership          | .44*                   | .43*                        | .39*                      | .45*                                              | .30*                                        | .54*                               |
| Forgiveness         | .55*                   | .45*                        | .30*                      | .46*                                              | .25*                                        | .54*                               |
| Humility            | .41*                   | .53*                        | .50*                      | .59*                                              | .49*                                        | .66*                               |
| Prudence            | .43*                   | .44*                        | .43*                      | .42*                                              | .28*                                        | .53*                               |
| Self-Regulation     | .29*                   | .21*                        | .21*                      | .21*                                              | .31*                                        | .32*                               |
| Beauty              | .49*                   | .51*                        | .40*                      | .49*                                              | .49*                                        | .60*                               |
| Gratitude           | .55*                   | .54*                        | .44*                      | .48*                                              | .61*                                        | .68*                               |
| Hope                | .38*                   | .40*                        | .23*                      | .37*                                              | .42*                                        | .49*                               |
| Humor               | .67*                   | .60*                        | .42*                      | .59*                                              | .49*                                        | .68*                               |
| Spirituality        | .65*                   | .67*                        | .68*                      | .72*                                              | .80*                                        | .78*                               |

*Notes.* Beauty = appreciation of beauty and excellence.

\**p* < .01 (two-tailed).
